# Supplementary material for: Sequential viral introductions and spread of BA.1 drove the Omicron wave across Pakistani provinces
Source: bioRxiv or medRxiv preprint supplement (doi:10.1101/2023.03.25.23287718), 2023-03-27

Supplementary Figure 1

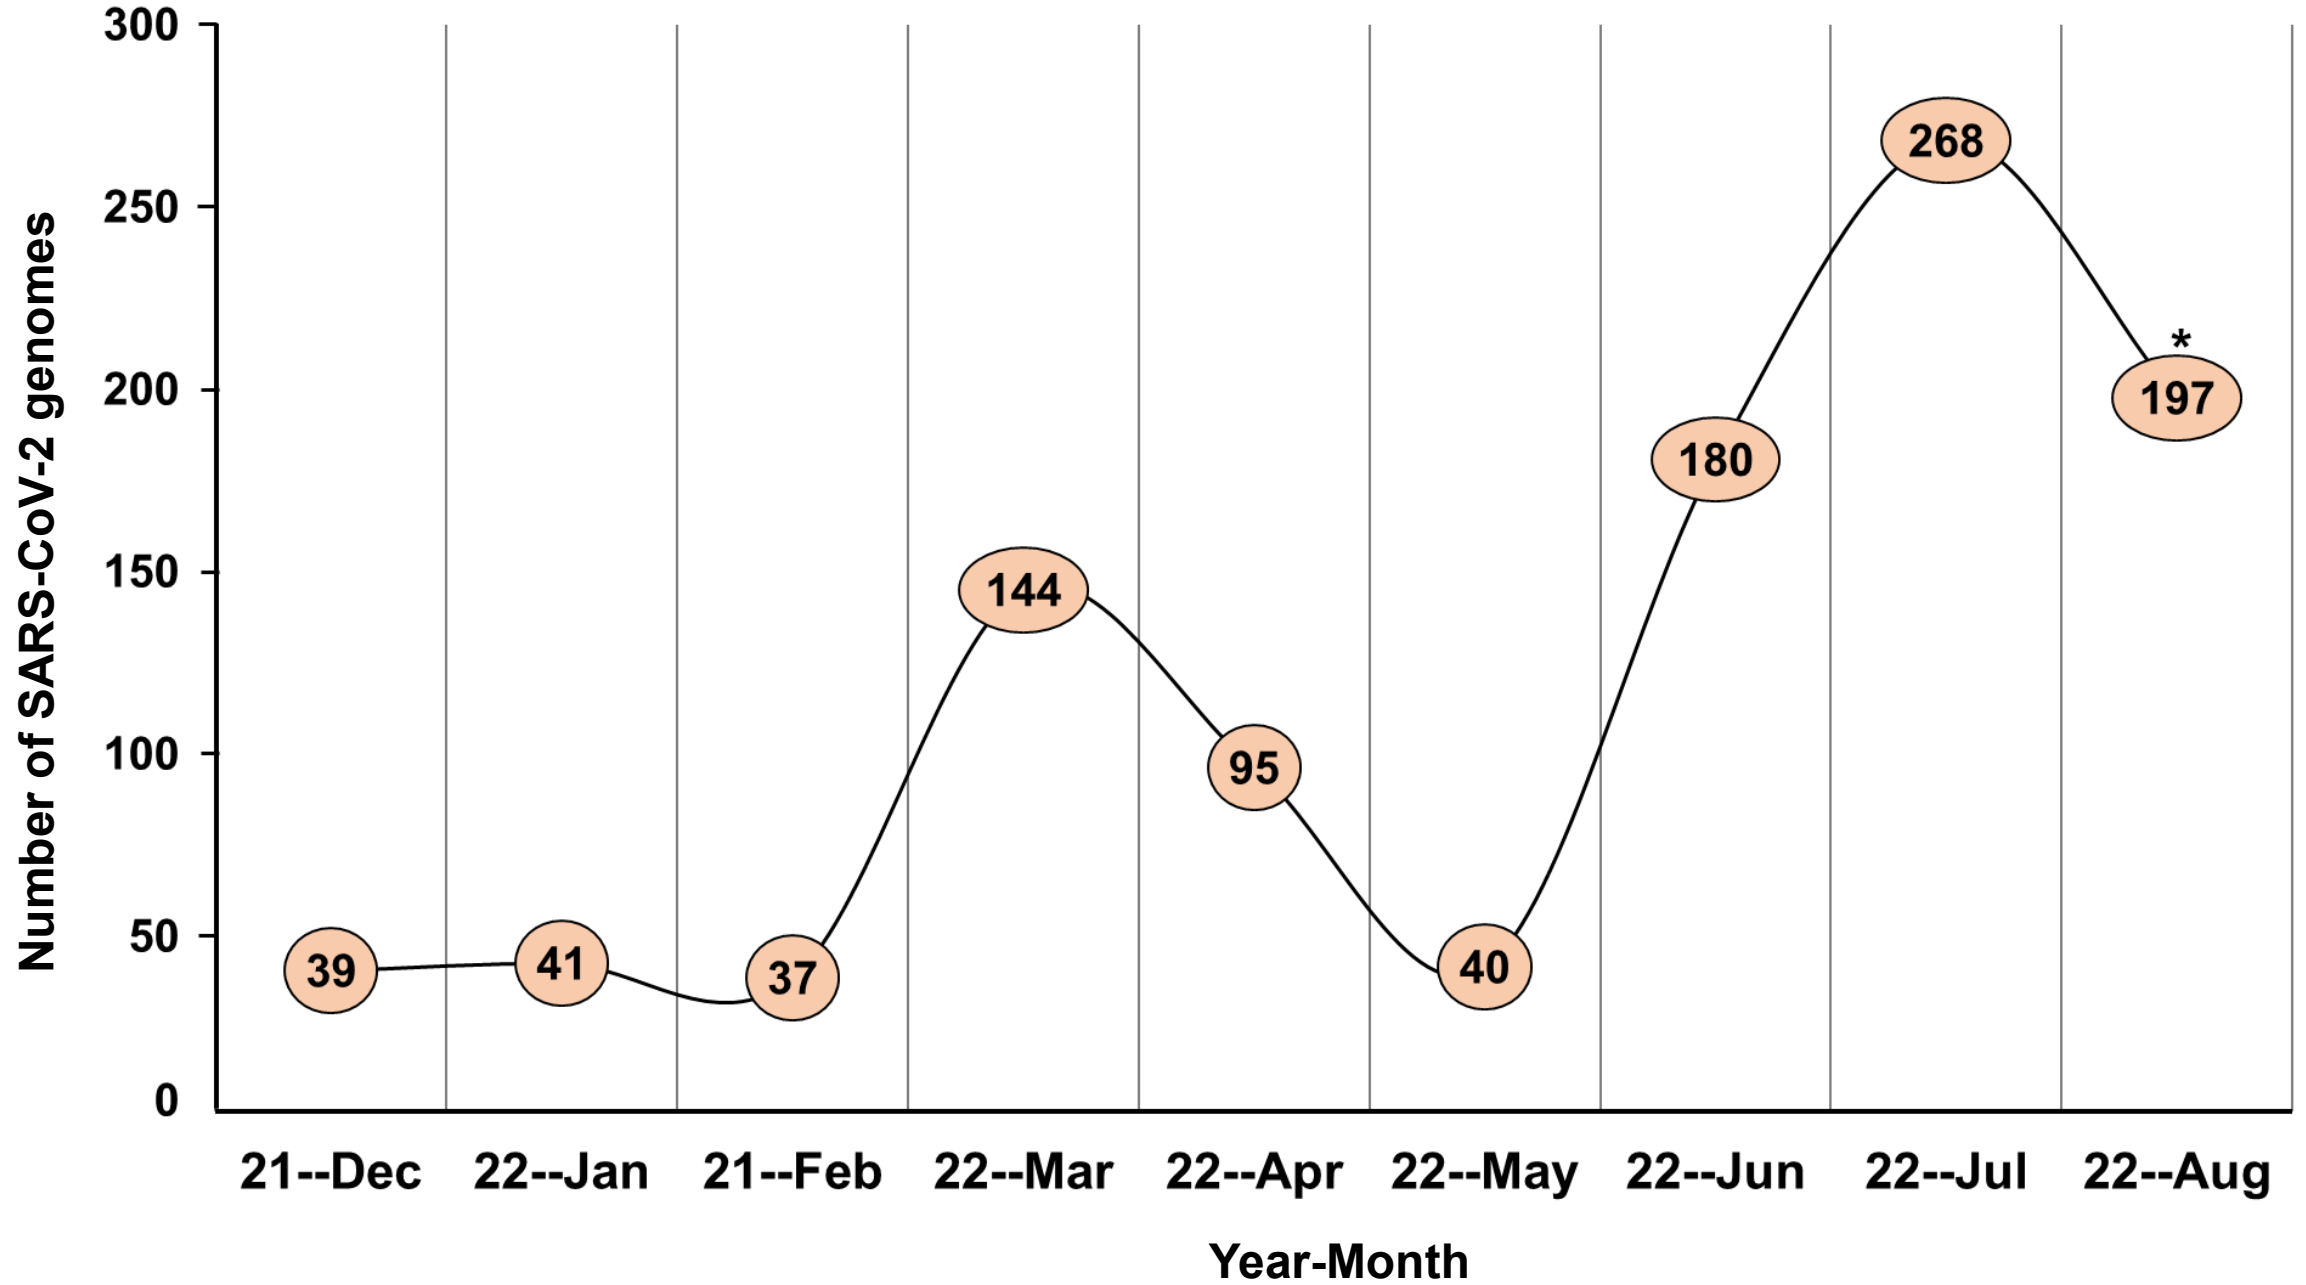

Supplement: Supplementary file [file media-1.pdf]
